# Supplementary material for: New strategies for economically feasible CO2 electroreduction using a porous membrane in zero-gap configuration
Source: Royal Society of Chemistry journal article supplement (doi:10.1039/d1ta03182a), 2021-01-01
Supplement: d1ta03182a1.pdf [file d1ta03182a1.pdf]

## Supporting Information:

### New strategies for economically feasible CO<sub>2</sub> electroreduction using a porous membrane in zero-gap configuration

Woong Hee Lee <sup>1,2†</sup>, Kyeongsu Kim <sup>1†</sup>, Chulwan Lim <sup>1,3</sup>, Young-Jin Ko <sup>1</sup>,  
Yun Jeong Hwang <sup>2</sup>, Byoung Koun Min <sup>1,5</sup>, Ung Lee <sup>1,4,5\*</sup>, and Hyung-Suk Oh <sup>1,4,6\*</sup>

<sup>1</sup> *Clean Energy Research Center, Korea Institute of Science and Technology (KIST), Hwarang-ro 14-gil 5, Seongbuk-gu, Seoul 02792, Republic of Korea*

<sup>2</sup> *Department of Chemistry, Seoul National University, Gwanak-ro 1, Gwanak-gu, Seoul 08826, Republic of Korea*

<sup>3</sup> *Department of Chemical and Biological Engineering, Korea University, 145, Anam-ro, Seongbuk-gu, Seoul 02841, Republic of Korea*

<sup>4</sup> *Division of Energy and Environmental Technology, KIST school, Korea University of Science and Technology (UST), Seoul 02792, Republic of Korea*

<sup>5</sup> *KU·KIST Graduate School of Energy and Environment, Korea University, 145 Anam-ro, Seongbuk-gu, Seoul 02841, Republic of Korea*

<sup>6</sup> *KHU-KIST Department of Convergencing Science and Technology, Kyung Hee University, Seoul 02447, Republic of Korea*

† The authors have contributed equally to this work.

#### **\*Corresponding Authors**

E-mail: ulee@kist.re.kr (U. Lee), hyung-suk.oh@kist.re.kr (H. -S. Oh)

Tel.: +82 (0)2 958 5292

Fax: +82 (0)2 958 5890

## Simulation and technoeconomic calculation methods

- Unit production rate of CO:

$$\dot{n}_{CO} = \frac{CD \times FE_{CO}}{F \times z_{CO}} \quad [\text{mol s}^{-1}\text{cm}^{-2}]$$

where CD,  $FE_{CO}$ , F, and  $z_{CO}$ , indicate current density, Faraday efficiency of CO, Faraday constant, and electron number of the CO producing reaction.

- Unit production rate of H<sub>2</sub>:

$$\dot{n}_{H_2} = \frac{CD \times FE_{H_2}}{F \times z_{H_2}} \quad [\text{mol s}^{-1}\text{cm}^{-2}]$$

where  $FE_{H_2}$  and  $z_{H_2}$  indicate Faraday efficiency of H<sub>2</sub> and electron number of the H<sub>2</sub> producing reaction.

- Required electrolyzer cell area  $A_{\text{cell}}$ :

$$A_{\text{cell}} = \frac{\dot{n}_{CO_2}^{in} \times X}{\dot{n}_{CO}} \quad [\text{m}^2]$$

where  $\dot{n}_{CO_2}^{in}$  and X indicate molar flowrate of CO<sub>2</sub> into electrolyzer and one-pass CO<sub>2</sub> conversion.

- Base case for carbon capture process

The base carbon capture process that can captures 90% of inlet CO<sub>2</sub> was simulated via Aspen Plus. The CO<sub>2</sub> mass flowrate for the base case capture process was set to 12440 kg/h and the corresponding equipment cost was calculated as \$11.2 M. Cost calculation methods was referred from Seider et al.<sup>1</sup>

- Cost calculation for carbon capture

The equipment installation cost of carbon capture process was assumed to be obtained from the equation of CO<sub>2</sub> mass flowrate as below:

$$C_{cap} = C_{base} \times \left( \frac{\dot{m}_{CO_2}}{\dot{m}_{CO_2, base}} \right)^{0.6}$$

where  $C_{base}$ ,  $\dot{m}_{CO_2}$ , and  $\dot{m}_{CO_2, base}$  indicate the equipment cost for carbon capture process, the inlet CO<sub>2</sub> mass flowrate into capture process, and the inlet CO<sub>2</sub> mass flowrate into capture process for the base case.

The operating cost of carbon capture process was calculated using the amount of 50 psig steam required for regeneration of MEA.

$$C_{cap, op} = \dot{m}_{CO_2} \times G_{re} \times C_{steam, 50psig} \times T_{op} \text{ [\$ year}^{-1}\text{]}$$

where  $G_{re}$ ,  $C_{steam, 50psig}$ , and  $T_{op}$  indicate the unit MEA regeneration energy per ton CO<sub>2</sub>, 50 psig steam purchase cost, and the process operating hours in a year ( $T_{op} = 8,000$  hours).

- Capital cost calculation

|                                                |                                                                                         |
|------------------------------------------------|-----------------------------------------------------------------------------------------|
| <b>Total bare-module investment (TBM)</b>      | = Total bare-module costs for equipment + costs for computers, and software (\$20,000). |
| <b>Total direct permanent investment (DPI)</b> | = Cost of site preparation (10% of TBM) + TBM                                           |
| <b>Total depreciable capital (TDC)</b>         | = Cost of contingencies and contractor's fee (15% of DPI) + DPI                         |
| <b>Total permanent investment (TPI)</b>        | = Cost of land (2% of TDC) + Cost of plant startup (2% of TDC) + TDC                    |

\* The bare-module costs for equipment were calculated via Guthrie's method<sup>2</sup> and the required data was obtained using Aspen Plus simulation

- Operating cost calculation

| <b>Cost Factor</b>                     | <b>Annual Cost (\$)</b>     |
|----------------------------------------|-----------------------------|
| <i>Operations (labor-related) (Op)</i> |                             |
| Direct wages and benefits (DW&B)       | \$2,800,000                 |
| Direct salaries and benefits           | 15% of DW&B                 |
| Operating supplies and services        | 6% of DW&B                  |
| Technical assistance to manufacturing  | \$200,000                   |
| Control laboratory                     | \$216,667                   |
| <i>Maintenance (Ma)</i>                |                             |
| Wages and benefits (MW&B)              | 3.5% of TDC                 |
| Salaries and benefits                  | 25% of MW&B                 |
| Materials and services                 | 100% of MW&B                |
| Maintenance overhead                   | 5% of MW&B                  |
| <i>Operating overhead</i>              |                             |
| General plant overhead                 | 7.1% of <i>Ma+Op</i> -SW&B  |
| Mechanical department services         | 2.4% of <i>Ma+Op</i> - SW&B |
| Employee relations department          | 5.9% of <i>Ma+Op</i> - SW&B |
| Business services                      | 7.4% of <i>Ma+Op</i> - SW&B |
| <i>Property taxes and insurance</i>    |                             |
|                                        | 2% of TDC                   |
| <i>Depreciation</i>                    |                             |
| Direct plant                           | 8% of (TDC-1.18alloc)       |
| Allocated plant                        | 6% of 1.18alloc             |
| <i>General Expenses</i>                |                             |
| Selling (or transfer) expense          | 3% (1%) of sales            |
| Direct research                        | 4.8% of sales               |
| Allocated research                     | 0.5% of sales               |
| Administrative expense                 | 2.0% of sales               |
| Management incentive compensation      | 1.25% of sales              |

\* The sales (CO sales) and utility costs (electricity, steam, and refrigerants) were calculated based on the results of Aspen Plus simulation

- Cash flow

Cash flow analysis was performed with 15 years plant life, 2 years plant construction period, 5 years of class life MACRS (Modified Accelerated Cost Recovery System) depreciation, 15% nominal interest rate, and 38.9% income tax rate to calculate net present value (NPV).

**Table S1.** Parameters for sensitivity analysis

| Parameter                           | Unit                                | 1 <sup>st</sup> scenario |             | 2 <sup>nd</sup> scenario |             |
|-------------------------------------|-------------------------------------|--------------------------|-------------|--------------------------|-------------|
|                                     |                                     | PM                       | AEM         | PM                       | AEM         |
| Unit membrane cost                  | \$ m <sup>-2</sup>                  | 316 ± 10%                | 3,167 ± 10% | 316 ± 10%                | 3,167 ± 10% |
| CO <sub>2</sub> crossover ratio     | -                                   | 0 ~ 10%                  | 0           | 0 ~ 10%                  | 0           |
| Current density                     | mA cm <sup>-2</sup>                 | 500                      |             | 100 ~ 2000               |             |
| CO Faraday Efficiency               |                                     | 0.9                      |             | 0.5 ~ 0.99               |             |
| One-pass CO <sub>2</sub> conversion |                                     | 0.1                      |             | 0.01 ~ 0.5               |             |
| Cell voltage                        | V                                   | 3                        |             | 1.3 ~ 3.5                |             |
| Unit electricity cost               | \$ kWh <sup>-1</sup>                | 0.06                     |             | 0.06 ~ 0.1               |             |
| Unit regeneration energy            | GJ tonCO <sub>2</sub> <sup>-1</sup> | 3 ~ 5                    |             |                          |             |
| Operating years                     | years                               | 15                       |             |                          |             |
| Membrane replacement period         | years                               | 7                        |             |                          |             |

**Table S2.** Parameters for technoeconomic analysis

| <b>Parameters</b>                             | <b>Unit</b>                                      | <b>Value</b> |
|-----------------------------------------------|--------------------------------------------------|--------------|
| <i>Utility cost</i>                           |                                                  |              |
| Steam, 450 psig <sup>1</sup>                  | \$ kg <sup>-1</sup>                              | 0.0145       |
| Steam, 150 psig <sup>1</sup>                  | \$ kg <sup>-1</sup>                              | 0.0105       |
| Steam, 50 psig <sup>1</sup>                   | \$ kg <sup>-1</sup>                              | 0.0066       |
| Process water <sup>1</sup>                    | \$ m <sup>-3</sup>                               | 0.2          |
| KHCO <sub>3</sub> <sup>3</sup>                | \$ kg <sup>-1</sup>                              | 1.38         |
| Refrigeration, -150°F <sup>1</sup>            | \$ GJ <sup>-1</sup>                              | 12.60        |
| Refrigeration, -90°F <sup>1</sup>             | \$ GJ <sup>-1</sup>                              | 10.30        |
| Refrigeration, -30°F <sup>1</sup>             | \$ GJ <sup>-1</sup>                              | 7.90         |
| Refrigeration, 10°F <sup>1</sup>              | \$ GJ <sup>-1</sup>                              | 5.50         |
| Chilled water, 0°F <sup>1</sup>               | \$ GJ <sup>-1</sup>                              | 4.00         |
| Cooling water <sup>1</sup>                    | \$ m <sup>-3</sup>                               | 0.02         |
| Direct wages and benefit (DW&B) <sup>1</sup>  | \$ operator <sup>-1</sup> hr <sup>-1</sup>       | 35           |
| Number of workers                             | -                                                | 10           |
| Tech assistance to manufacturing <sup>1</sup> | \$ shift operator <sup>-1</sup> yr <sup>-1</sup> | 60,000       |
| Control laboratory <sup>1</sup>               | \$ shift operator <sup>-1</sup> yr <sup>-1</sup> | 65,000       |
| Operating hour                                | hr yr <sup>-1</sup>                              | 8,000        |
| <i>Catalyst prices</i>                        |                                                  |              |
| Ag <sup>4</sup>                               | \$ kg <sup>-1</sup>                              | 490          |
| Ir <sup>4</sup>                               | \$ kg <sup>-1</sup>                              | 46,940       |
| <i>Economic factors</i>                       |                                                  |              |

|                     |      |              |
|---------------------|------|--------------|
| Plant life          | year | 15           |
| Construction period | year | 2            |
| Income tax          | %    | 38.9         |
| Interest rate       | %    | 15           |
| MACRS               | -    | 5-year class |

---

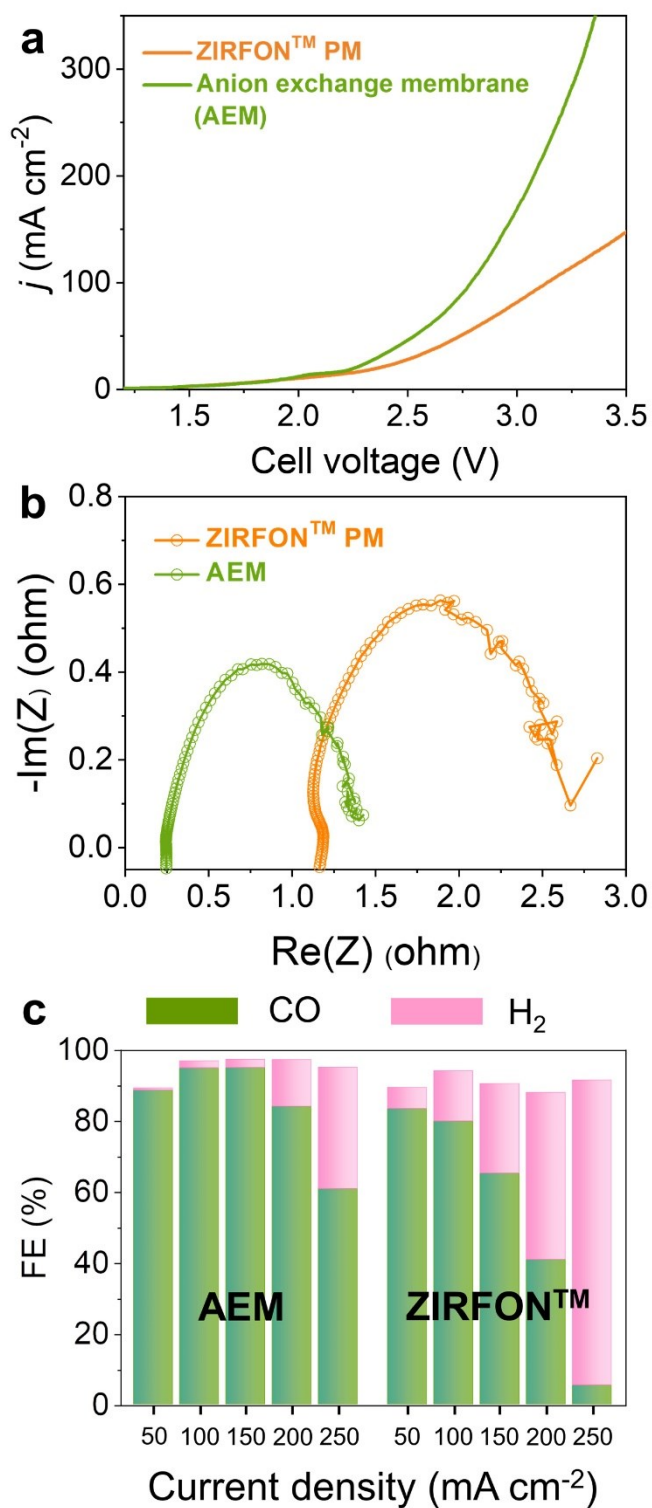

**Figure S1.** (a) Cell voltage and current density curve, (b) impedance and (c) Faraday efficiency (FE) of commercial ZERFON PERL™ porous membrane applied zero-gap electrolyzer for CO<sub>2</sub>RR. Anode: 1 mg cm<sup>-2</sup> IrO<sub>2</sub> on Pt-coated Ti mesh. Cathode: 0.5 mg cm<sup>-2</sup> Ag black on carbon paper. Anolyte: 0.5 M KHCO<sub>3</sub>.



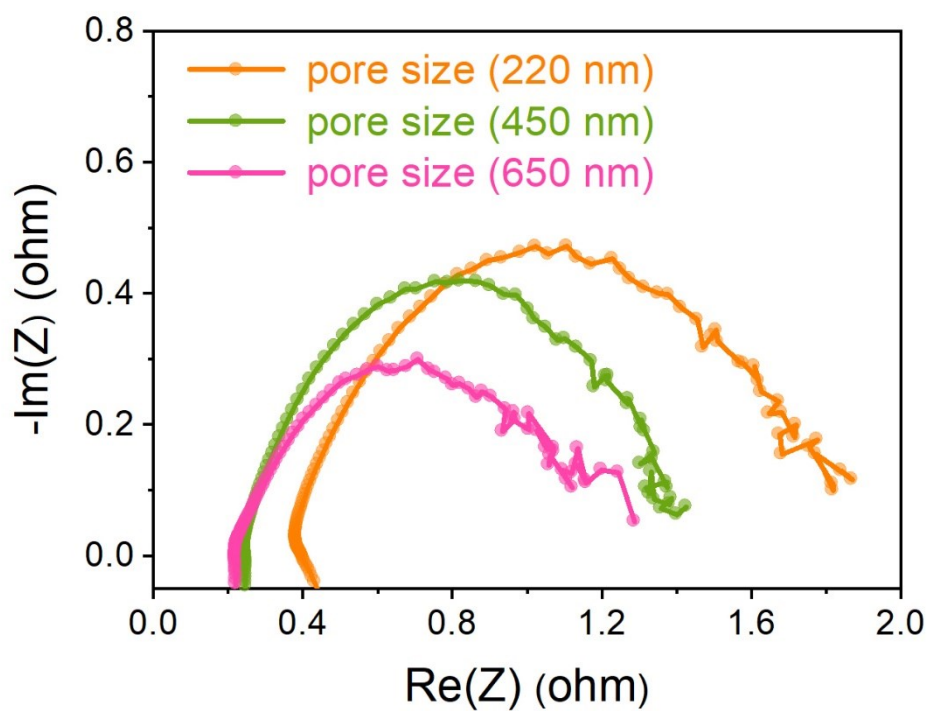

**Figure S2.** Impedance of porous membrane (PM) applied zero-gap CO<sub>2</sub>RR device using Ag electrode with different pore size of PM. Anode: 1 mg cm<sup>-2</sup> IrO<sub>2</sub> on Pt-coated Ti mesh. Cathode: 0.5 mg cm<sup>-2</sup> Ag black on carbon paper. PM: polyvinylidene difluoride (PVDF) porous membrane. Anolyte: 0.5 M KHCO<sub>3</sub>.

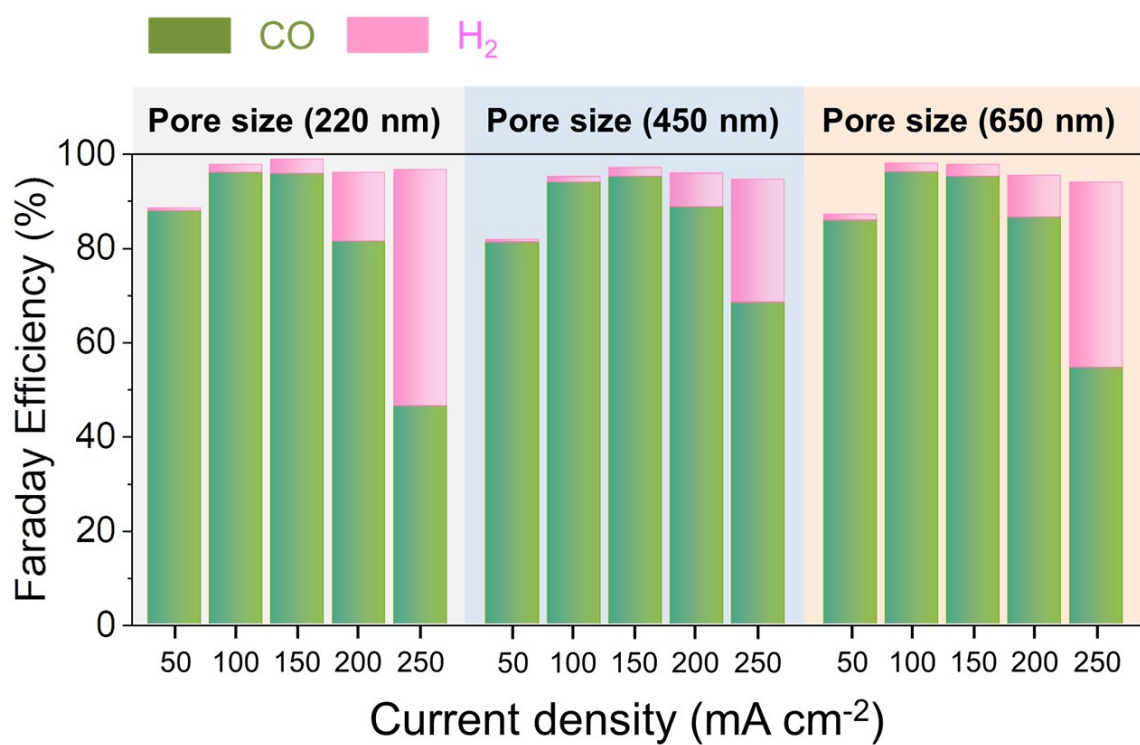

**Figure S3.** Faraday efficiency of zero-gap electrolyzer for CO<sub>2</sub>RR using PM with different pore sizes. Anode: 1 mg cm<sup>-2</sup> IrO<sub>2</sub> on Pt-coated Ti mesh. Cathode: 0.5 mg cm<sup>-2</sup> Ag black on carbon paper. PM: polyvinylidene difluoride (PVDF) porous membrane. Anolyte: 0.5 M KHCO<sub>3</sub>.

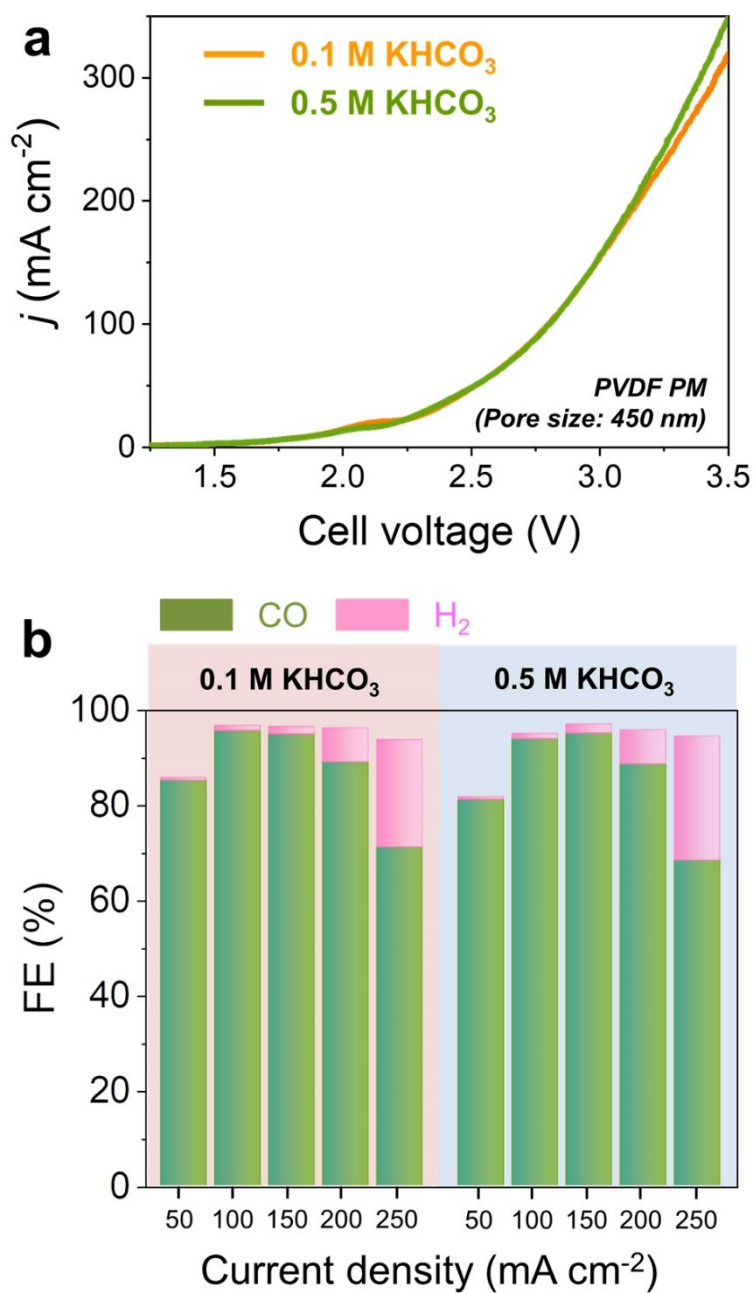

**Figure S4.** (a) Cell voltage and current density curve, and (b) Faraday efficiency of PM applied zero-gap electrolyzer for CO<sub>2</sub>RR. Anode: 1 mg cm<sup>-2</sup> IrO<sub>2</sub> on Pt-coated Ti mesh. Cathode: 0.5 mg cm<sup>-2</sup> Ag black on carbon paper. PM: polyvinylidene difluoride (PVDF) porous membrane, 450 nm pore size, 125 μm thickness. Anolyte: 0.1 M and 0.5 M KHCO<sub>3</sub>.

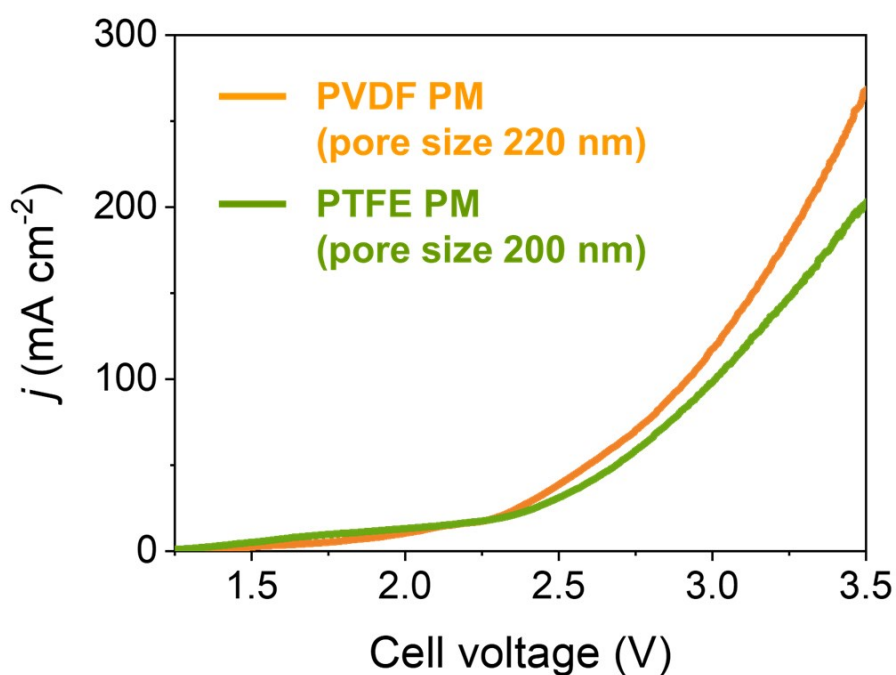

**Figure S5.** Cell voltage and current density curves of a zero-gap electrolyzer with hydrophilic and hydrophobic PM applied. Anode: 1 mg cm<sup>-2</sup> IrO<sub>2</sub> on Pt-coated Ti mesh. Cathode: 0.5 mg cm<sup>-2</sup> Ag black on carbon paper. PM: hydrophilic polyvinylidene difluoride (PVDF) porous membrane and hydrophobic polytetrafluoroethylene (PTFE) porous membrane. Anolyte: 0.5 M KHCO<sub>3</sub>.

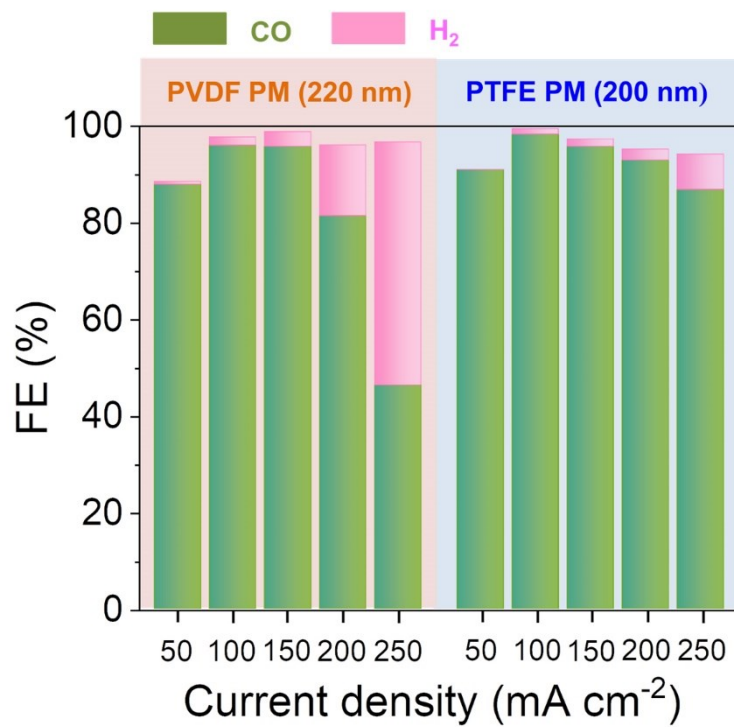

**Figure S6.** Faraday efficiency of a zero-gap electrolyzer with hydrophilic and hydrophobic PM applied. Anode: 1 mg cm<sup>-2</sup> IrO<sub>2</sub> on Pt-coated Ti mesh. Cathode: 0.5 mg cm<sup>-2</sup> Ag black on carbon paper. PM: hydrophilic polyvinylidene difluoride (PVDF) porous membrane and hydrophobic polytetrafluoroethylene (PTFE) porous membrane. Anolyte: 0.5 M KHCO<sub>3</sub>.

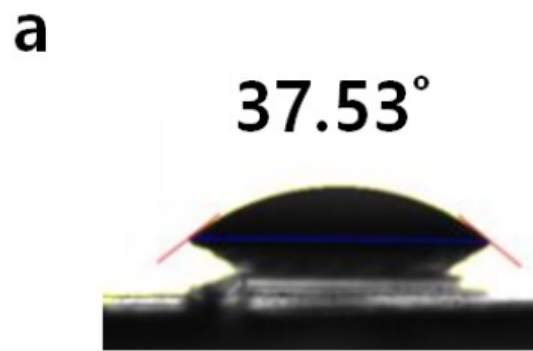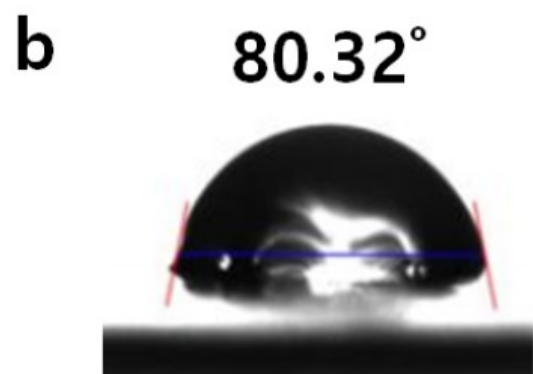

**Figure S7.** Water contact angle (WCA) photos of (a) porous PVDF membrane (pore size: 220 nm) and (b) porous PTFE membrane (pore size: 200 nm).

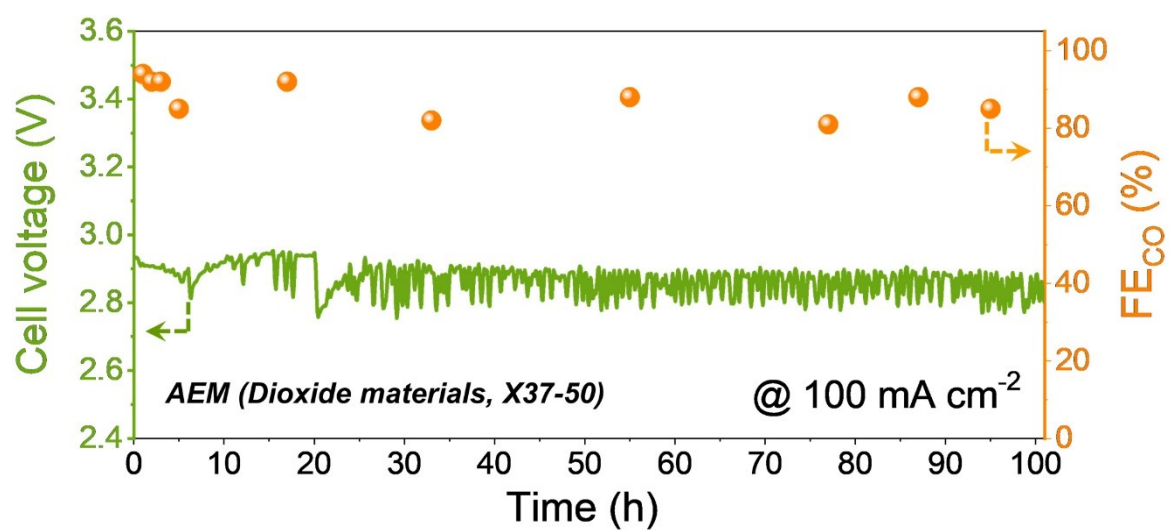

**Figure S8.** Durability test for the CO<sub>2</sub> electrolyzer employing AEM conducted for 100 h at a current density of 100 mA cm<sup>-2</sup>. Separator: AEM (anion exchange membrane, Dioxide materials, X37-50). Anode electrode: 1 mg cm<sup>-2</sup> IrO<sub>2</sub> on Pt-coated Ti mesh. Cathode electrode: 0.5 mg cm<sup>-2</sup> Ag black on carbon paper (Sigracet 39BB). Anolyte: 0.5 M KHCO<sub>3</sub>.

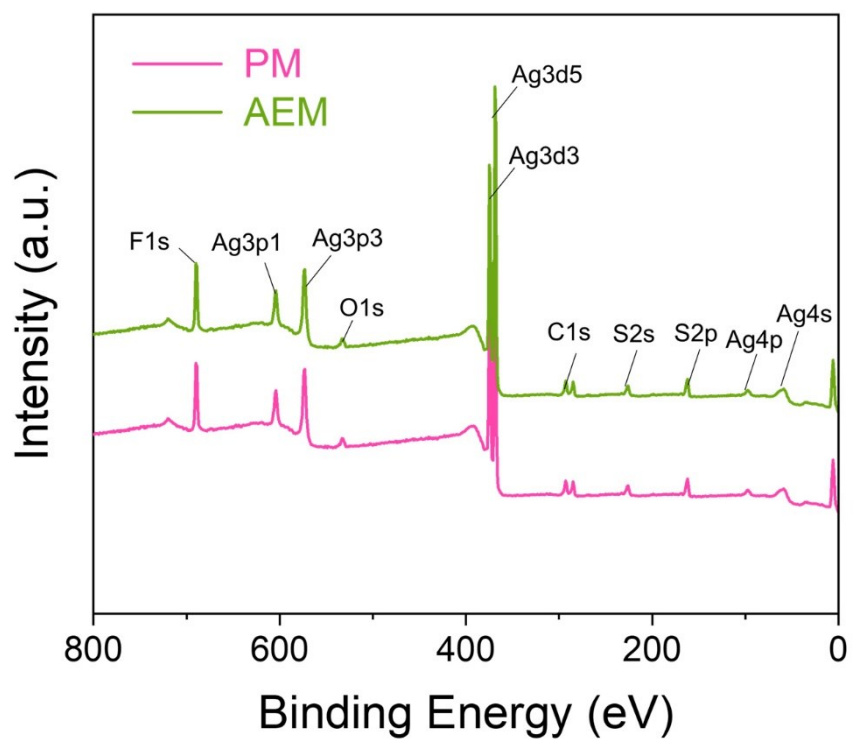

**Figure S9.** XPS survey spectra of Ag electrodes using PM- and AEM-applied CO<sub>2</sub> electrolyzer after stability test. PM (porous membrane): PVDF, 450 nm pore size, 125 μm thickness.



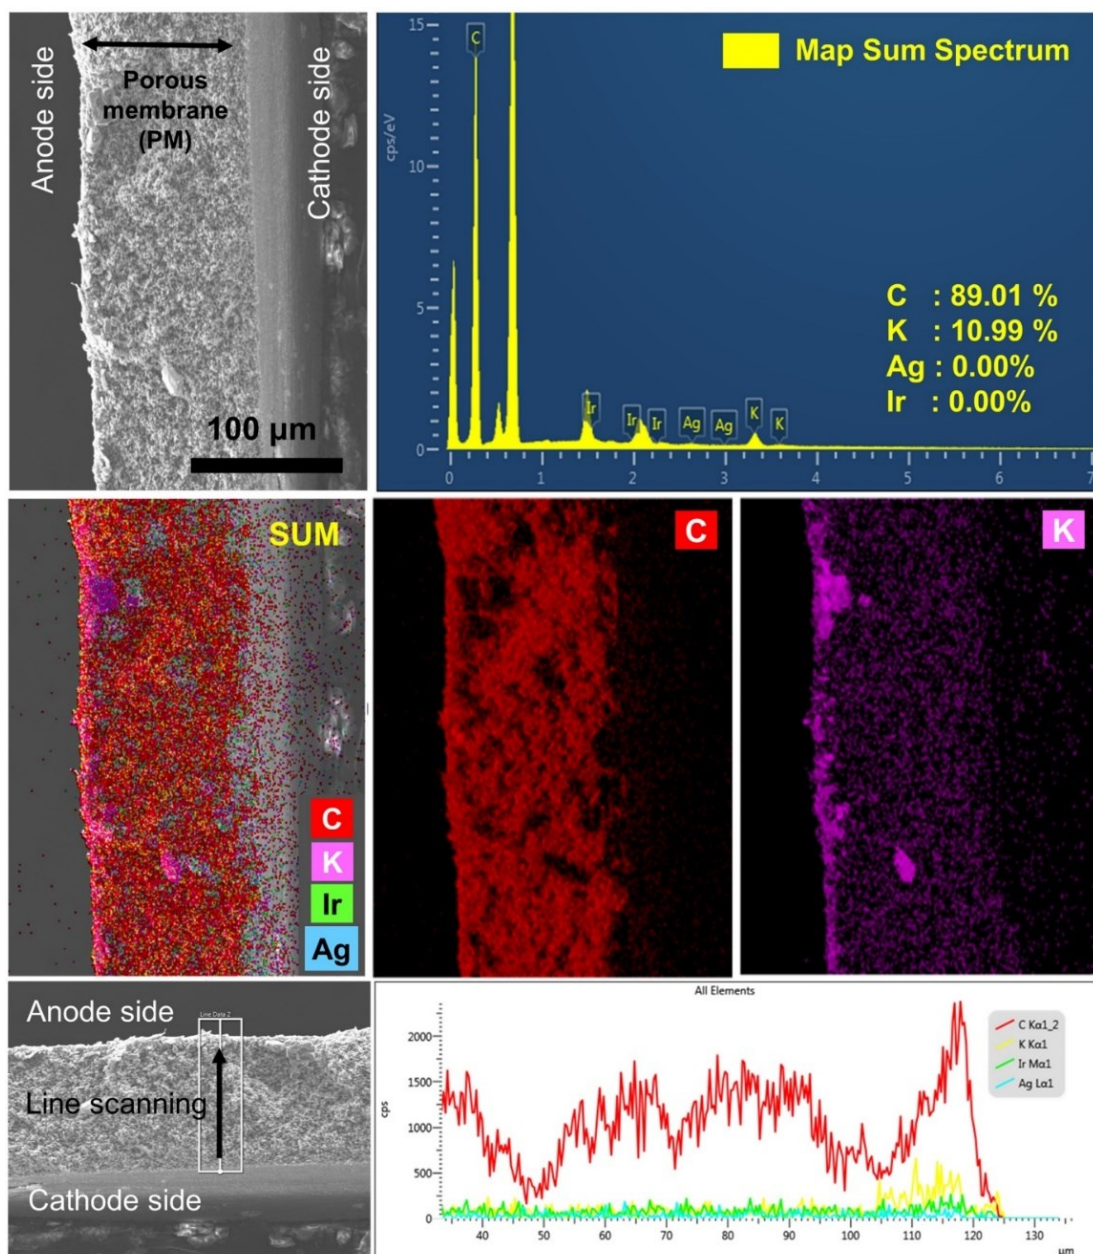

**Figure S10.** SEM, EDS elemental mapping, and cross section images of PM after CO<sub>2</sub>RR stability test for 100 h. PM (porous membrane): PVDF, 450 nm pore size, 125 μm thickness.

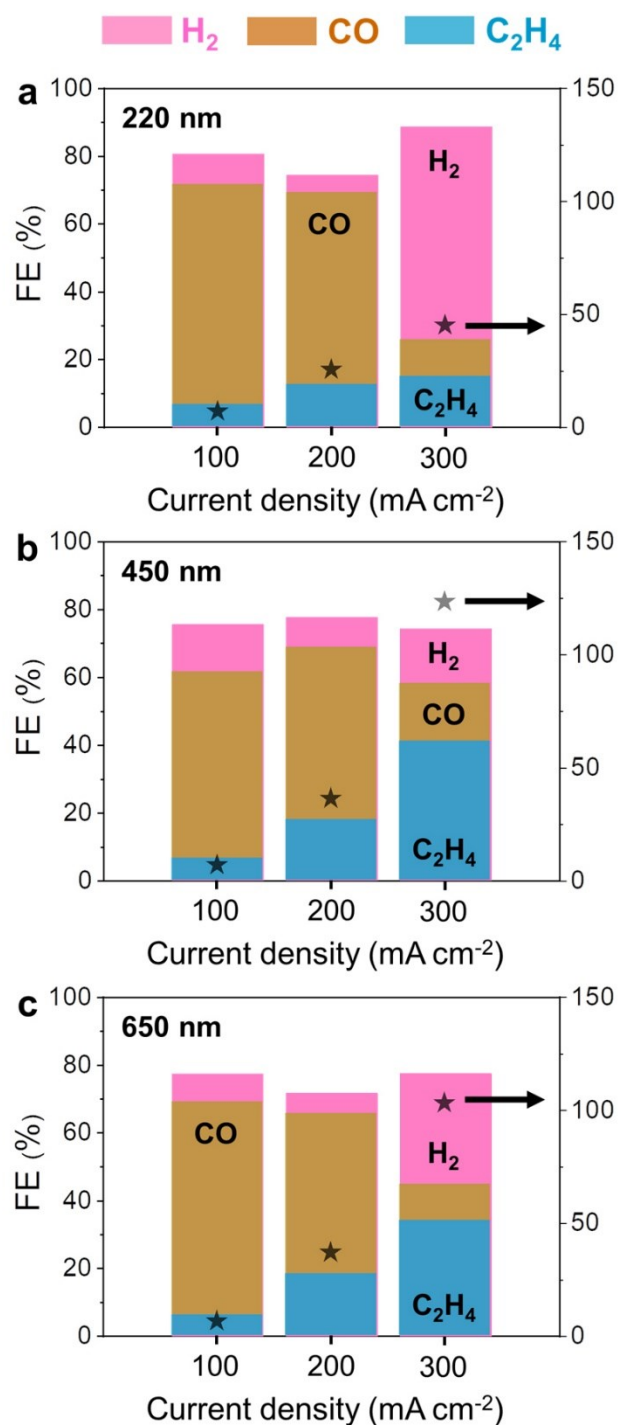

**Figure S11.** Faraday efficiency of zero-gap electrolyzer for  $\text{CO}_2\text{RR}$  using PM with different pore sizes. Anode:  $1 \text{ mg cm}^{-2}$   $\text{IrO}_2$  on Pt-coated Ti mesh. Cathode:  $0.5 \text{ mg cm}^{-2}$  Cu black on carbon paper. PM: polyvinylidene difluoride (PVDF) porous membrane. Anolyte:  $0.5 \text{ M KHCO}_3$ .

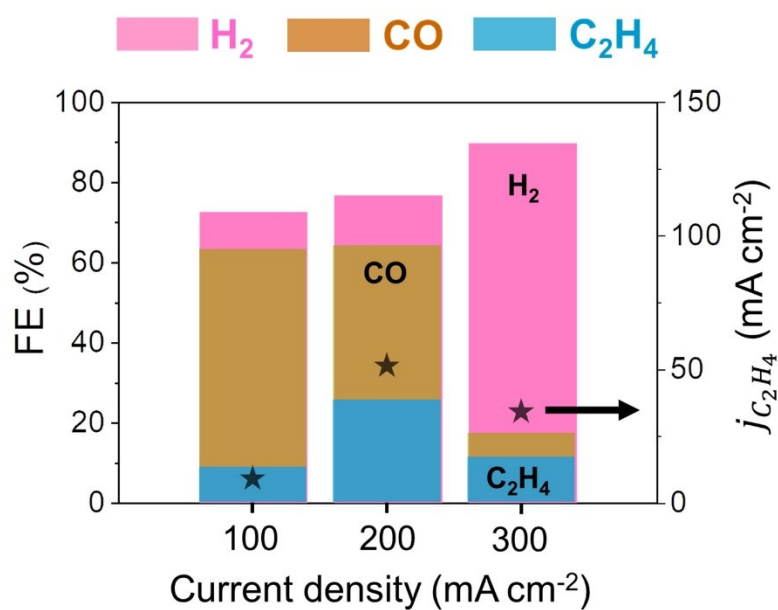

**Figure S12.** Faraday efficiency of zero-gap electrolyzer for CO<sub>2</sub>RR using hydrophobic PM. Anode: 1 mg cm<sup>-2</sup> IrO<sub>2</sub> on Pt-coated Ti mesh. Cathode: 0.5 mg cm<sup>-2</sup> Cu black on carbon paper. PM: polytetrafluoroethylene (PTFE) porous membrane, 200 nm pore size, 125 μm thickness. Anolyte: 0.5 M KHCO<sub>3</sub>.

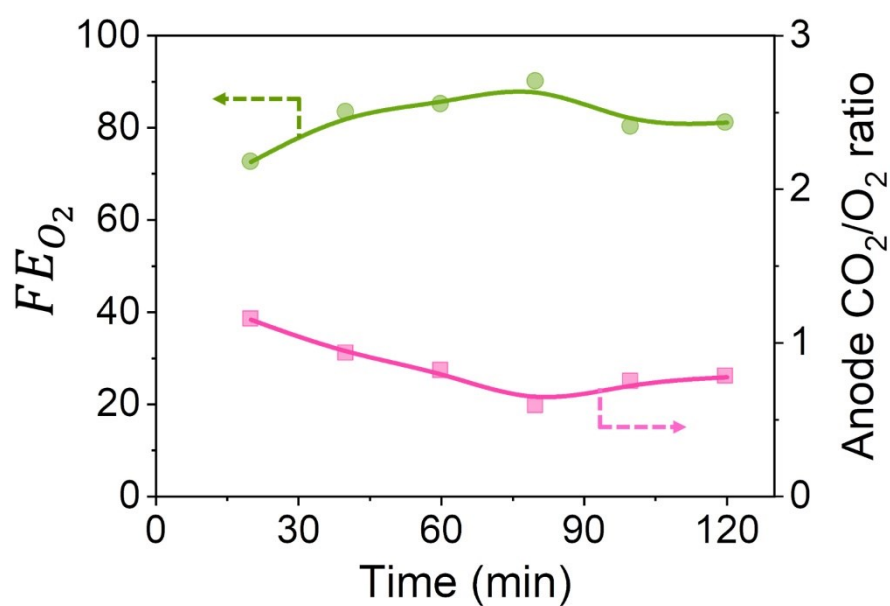

**Figure S13.**  $O_2$  Faraday efficiency (FE) and  $CO_2/O_2$  ratio at the anode outlet during  $CO_2$  reduction reaction ( $CO_2RR$ ) in PM-applied zero-gap electrolyzer using 1 M KCl anolyte. Anode:  $1 \text{ mg cm}^{-2}$   $IrO_2$  on Pt-coated Ti mesh. Cathode:  $0.5 \text{ mg cm}^{-2}$  Cu black on carbon paper. PM: polyvinylidene difluoride (PVDF) porous membrane, 450 nm pore size, 125  $\mu\text{m}$  thickness.

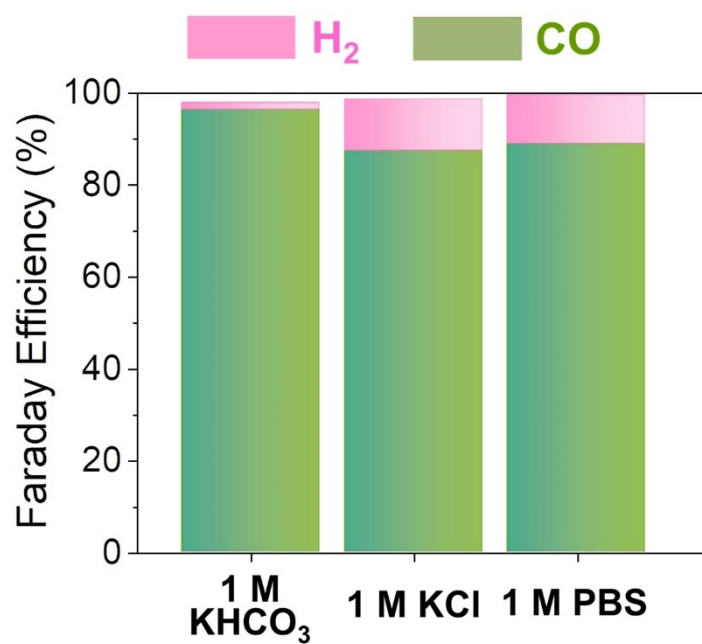

**Figure S14.** Faraday efficiency of PM-applied zero-gap electrolyzer for CO<sub>2</sub>RR using Ag electrode with 1 M KHCO<sub>3</sub>, 1 M KCl and 1 M PBS anolyte. Anode: 1 mg cm<sup>-2</sup> IrO<sub>2</sub> on Pt-coated Ti mesh. PM: polyvinylidene difluoride (PVDF) porous membrane, 450 nm pore size, 125 μm thickness.

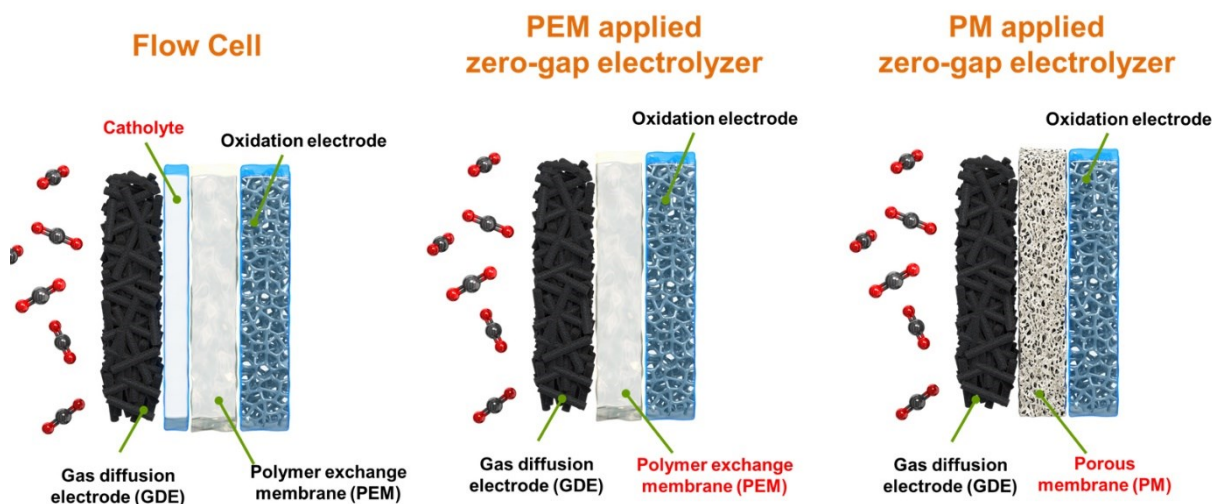

#### Advantage of PM-applied electrolyzer

- Cheap, good physical properties of membrane
- Stackable zero-gap structure (MEA-type)
- Scalable physical property
- Controllable of cathode reaction environmental
- Controllable of membrane properties
- Good chemical stability

#### Disadvantage of PM-applied electrolyzer

- Potential loss in the high current region
- Gas/ion crossover possibility
- Liquid products crossover to anode side
- Resistance depends on the electrolyte concentrate

**Figure S15.** Advantages and disadvantages of zero-gap electrolyzer with PM applied for CO<sub>2</sub>RR through comparison with flow cell and polymer exchange membrane (PEM) applied electrolyzers.

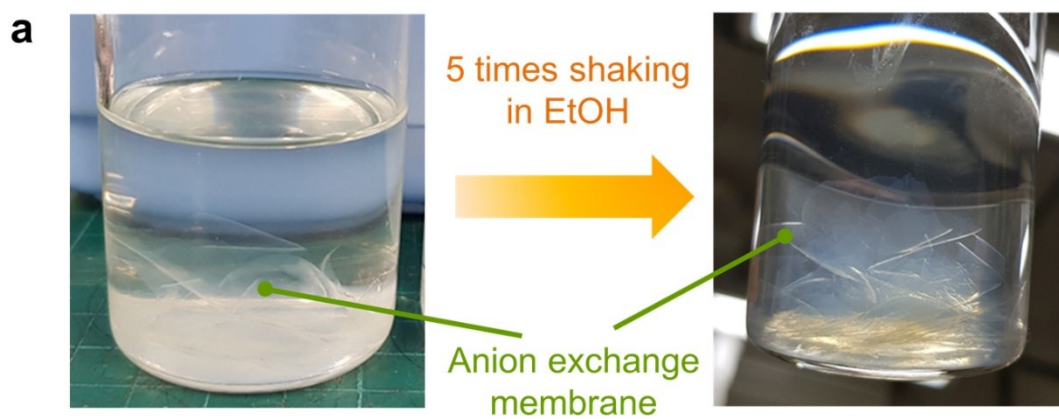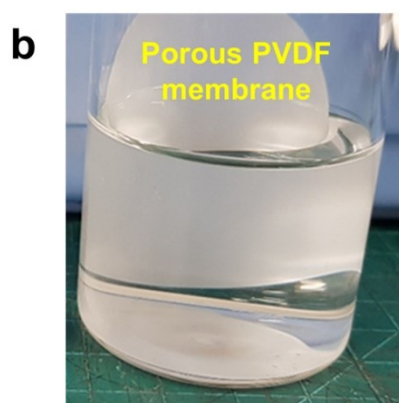

**Figure S16.** Mechanical strength of polymer exchange membrane (PEM) and porous membrane in ethanol. (a) Anion exchange membrane (AEM), (b) porous PVDF membrane (PM), 450 nm pore size, 125  $\mu\text{m}$  thickness.

## Reference

- 1 Seider, W. D., Seader, J. D. & Lewin, D. R. *PRODUCT & PROCESS DESIGN PRINCIPLES: SYNTHESIS, ANALYSIS AND EVALUATION, (With CD)*. (John Wiley & Sons, 2009).
- 2 Biegler LT, Grossmann IE, Westerberg AW. Systematic methods for chemical process design. 1997
- 3 Alibaba, Potassium Bicarbonate Price, Wholesale & Suppliers (accessed 15, March, 2019); <https://www.alibaba.com/showroom/potassium-bicarbonate-price.html>.
- 4 Zoelle, A. *et al.* Cost and Performance Baseline for Fossil Energy Plants Volume 1a: Bituminous Coal (PC) and Natural Gas to Electricity Revision 3. Report No. DOE/NETL-2015/1723 United States 10.2172/1480987 NETL English, Medium: ED (; NETL, 2015).
- 5 InfoMine, Mining Intelligence and Technology (accessed 22, January, 2019); <http://www.infomine.com>.
